# Supplementary material for: A novel approach to polymeric hollow nanospheres with stabilized structureElectronic supplementary information (ESI) available: experimental details. See http://www.rsc.org/suppdata/cc/b2/b210851h/
Source: Royal Society of Chemistry journal article supplement (doi:10.1039/b210851h), 2003-01-22
Supplement: b210851h.doc [file b210851h.doc]

**Supplementary Information**

**Experimental section**

**Chemicals** 2, 4-Diaminotoluence was purified by recrystallization from ethanol and dried at 25 0C in vacuum; 2-Hydroxyethyl acrylate (HEA) was purified as literature reported; NMP was distilled twice under reduced pressure. Bisphenol-A dianhydride (BISA), 1, 2, 4-Benzentricarboxylic anhydride, Benzophone, and N, N-Dicyclohexylcarbodiimde (DCC), Aldrich, were used as received.

**Preparation of carboxyl terminated poly (amic acid) ester (PAE)**

Condensation polymerization of an excess amount of diamine and BISA (the molar ratio of diamine/BISA was 1.1) was carried out in NMP for 4 hours with a total monomer concentration of 10wt. % at ambient temperature. The obtained poly (amic acid) (PAAs) was then treated with DCC as a condensing agent (the molar ratio of DCC/-COOH was 1.1) at ambient temperature for 12 hours. The hydrate DCC adduct, dicyclohexylurea, precipitated and then was filtered out. Afterwards, an excess amount of HEA (the molar ratio of HEA/-COOH was 1.1) was added to the solution, and the solution was kept at 60 0C. After 5 h, the obtained photosensitive poly (amic acid) ester oligomer was then capped with 1, 2, 4-Benzentricarboxylic anhydride to prepare PAE. The product was isolated by precipitation in ethanol and was then dried under vacuum at 25 0C. (yield, 65%)The molecular weight of PAE was determined by size exclusion chromatography using THF as an eluent based on polystyrene calibration. Its number-average molecular weight was 7450 and Mw/Mn was 1.23. The glass transition temperature (Tg) was 162°C. The FTIR spectrum was as follows. The band at 1635-1620cm-1is for C=C of acrylates, 1750-1725 cm-1 for the C=O of carboxylic acid and 1780-1745 cm-1 for the C=O of anhydride.

FTIR spectrum of PAE

**Preparation of Template Hollow aggregates and cross-linked Polymeric Hollow Nanospheres:**

1.5 ml of **PAE** solution in THF (C = 10.0mg / ml) was added dropwise to 13.5 ml of PVPy solution in THF (C = 0.11mg / ml) under ultrasonic. In the final solution the concentrations of PAE and PVPy were 1.0 mg/ ml and 0.10 mg/ml, respectively and the composition was PAE/PVPy 10/1 (w/w). The resultant solution displayed tinge blue opalescence. 6 wt % of Benzophenone based on PAE was added to the solution of template hollow aggregates. Crosslinking reactions were done by irradiating the solution with UV lamp (365nm, 300W). During irradiation, samples at 0.5mL each were removed for IR analysis to determine the extent of the crosslinking reaction. The peak-area ratio of C=C of acrylates at 1630 cm-1 to C=O of anhydride at 1740cm-1 was used to monitor the crosslinking reaction. It was found that the ratio decreases quickly at the initial stage and then became much slower after about 5 minutes exposure.

**Schematic Illustration of the synthesis of PAE:**
